# Supplementary material for: Azo-bridged covalent porphyrinic polymers (Azo-CPPs): synthesis and CO2 capture properties
Source: Royal Society of Chemistry journal article supplement (doi:10.1039/c5ra17671a), 2015-01-01
Supplement: c5ra17671a1.pdf [file c5ra17671a1.pdf]

*Electronic Supplementary Information for*  
**Azo-bridged Covalent Porphyrinic Polymers (Azo-CPPs): Synthesis and CO<sub>2</sub> Capture  
properties†**

Liming Tao<sup>a</sup>, Fang Niu<sup>b</sup>, Di Zhang<sup>a</sup>, Tingmei Wang<sup>a</sup> and Qihua Wang<sup>\*a</sup>

<sup>a</sup> *State Key Laboratory of Solid Lubrication, Lanzhou Institute of Chemical Physics, Chinese  
Academy of Sciences, Lanzhou, Gansu 730000, P.R. China. Fax: 86 0931 4968252; Tel: 86 0931  
4968252*

<sup>b</sup> *College of Chemistry and Chemical Engineering, Lanzhou University, Lanzhou, Gansu 730000,  
P.R. China. E-mail: niufang@lzu.edu.cn.*

*Corresponding to: qhwang@licp.cas.cn.*

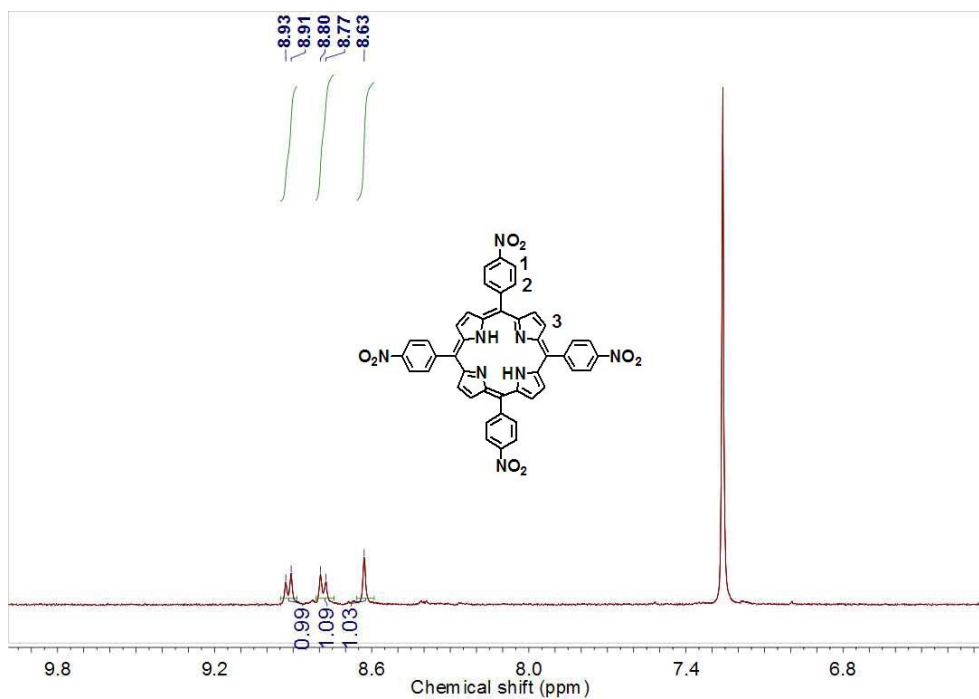

Fig. S1  $^1\text{H}$  NMR spectrum of 4NO<sub>2</sub>TPP (CDCl<sub>3</sub>, 400 MHz)

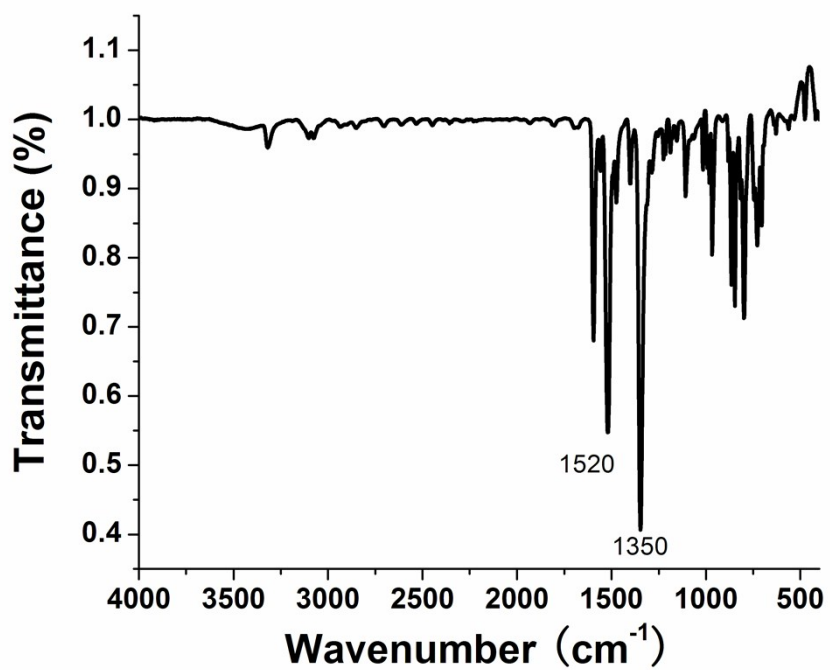

Fig. S2 FT-IR spectrum of 4NO<sub>2</sub>TPP (KBr pellets)

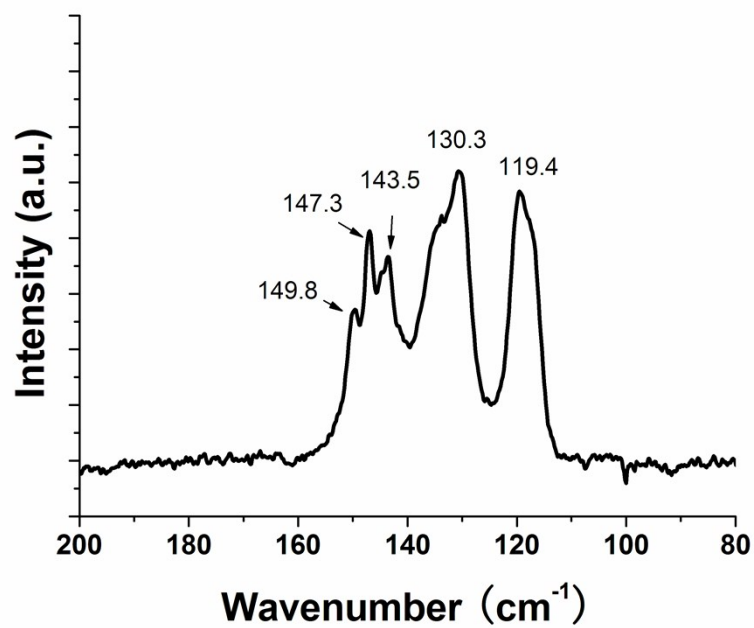

Fig. S3 Solid-state  $^{13}\text{C}$  NMR spectrum of 4NO<sub>2</sub>TPP (100 MHz)

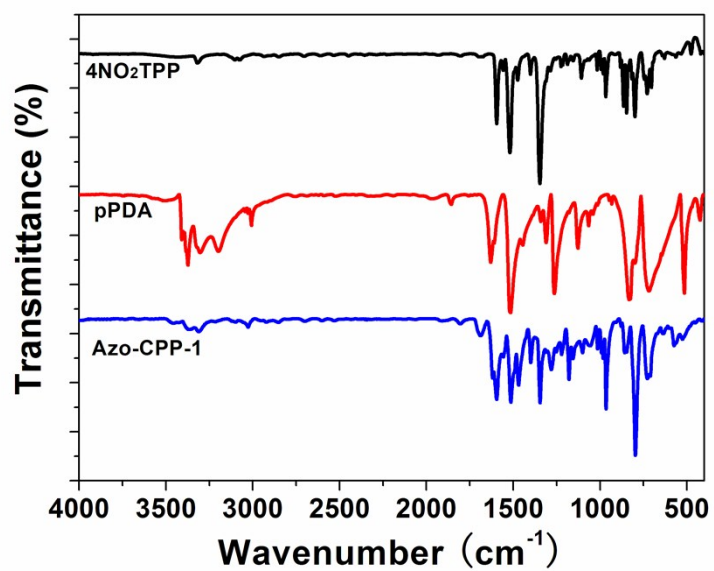

Fig. S4 FTIR spectra comparison of Azo-CPP-1 and the monomers (KBr pellets)

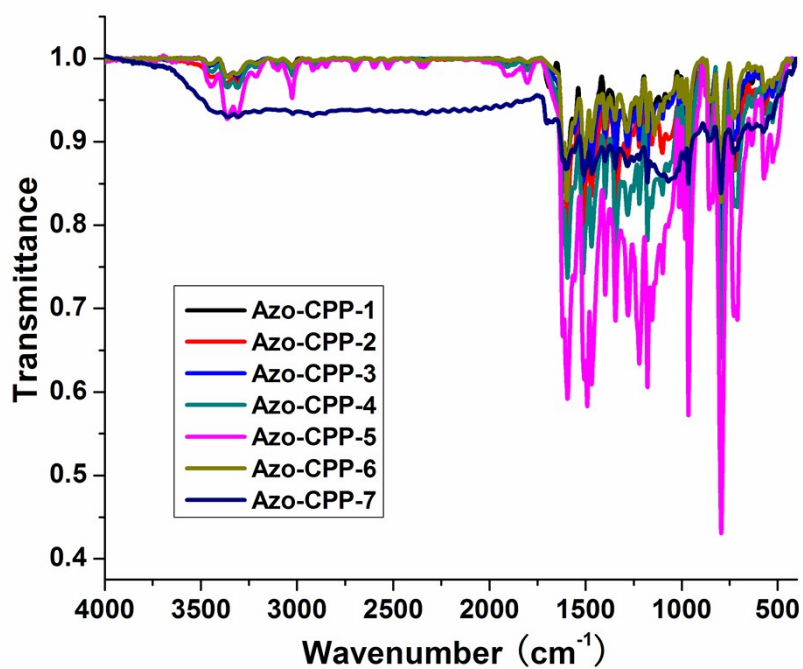

Fig. S5 FT-IR spectra of the Azo-CPPs. (KBr pellets)

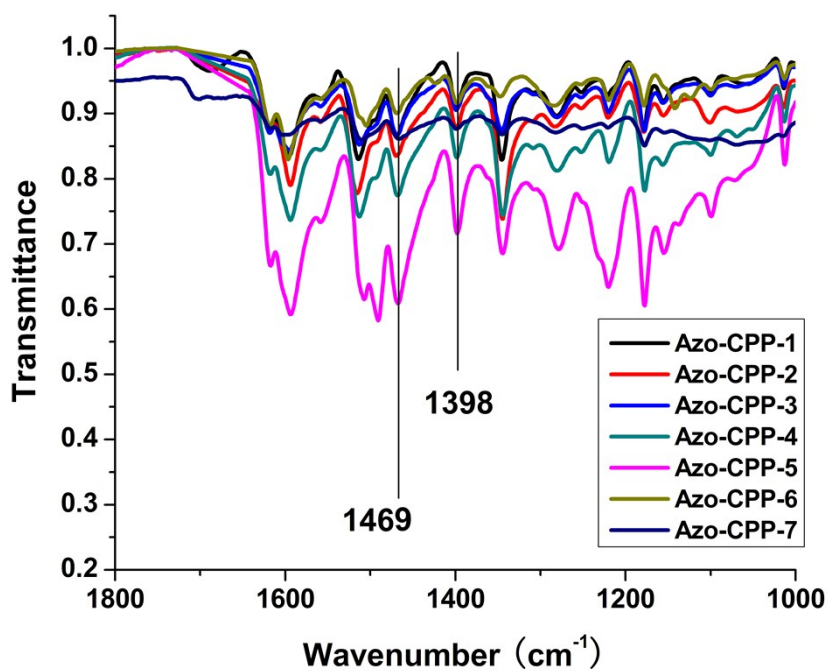

Fig. S6 FT-IR spectra of the Azo-CPPs, expanded between 1800 ~ 1000 cm<sup>-1</sup>. (KBr pellets)

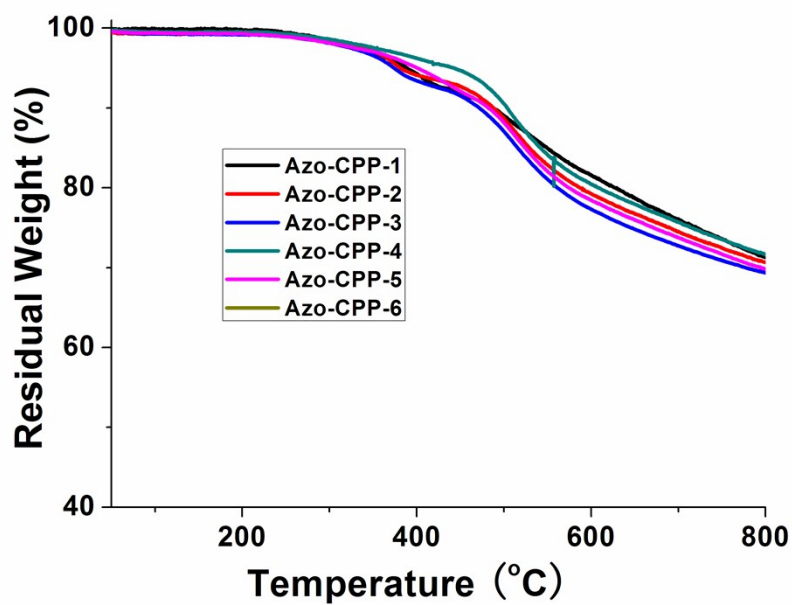

Fig. S7 TGA curves of Azo-CPPs. ( $N_2$ ,  $10\text{ }^\circ\text{C}/\text{min}$ )

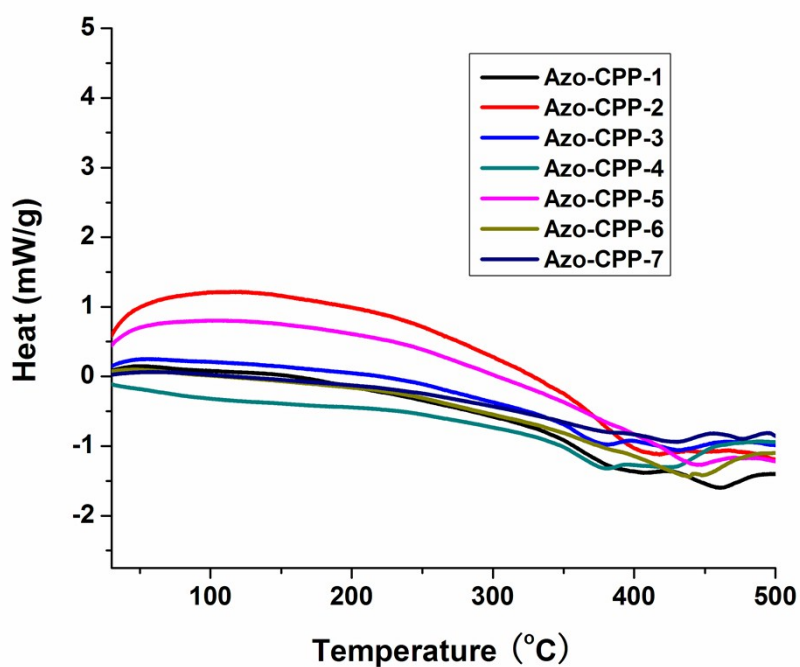

Fig. S8 DSC curves of the Azo-CPPs. ( $10\text{ }^\circ\text{C}/\text{min}$ ,  $N_2$ )

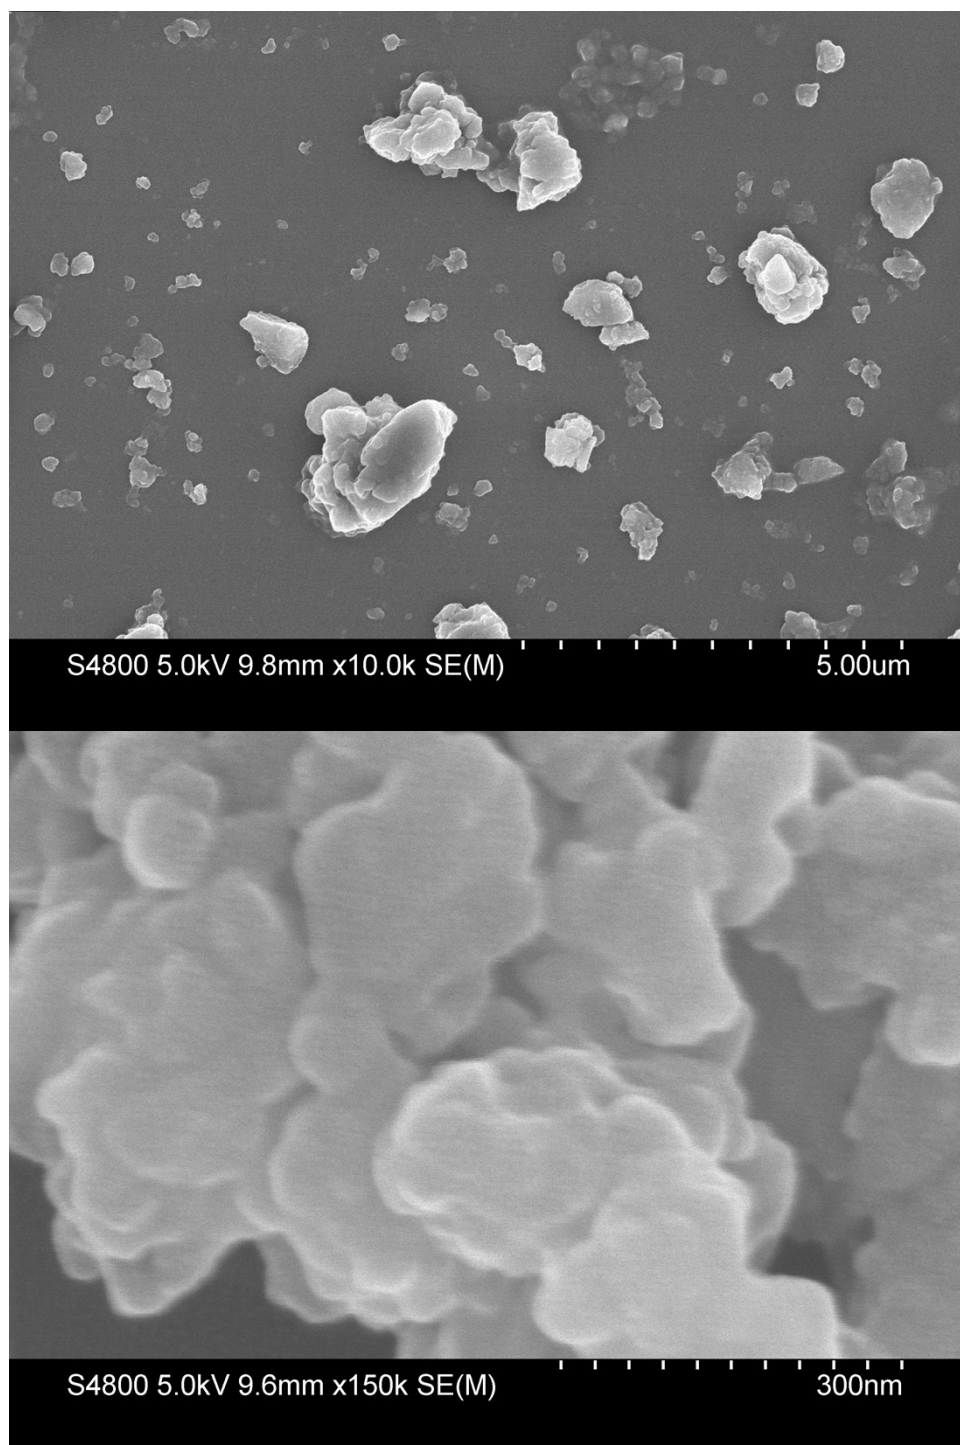

Fig. S9 SEM images of Azo-CPP-1

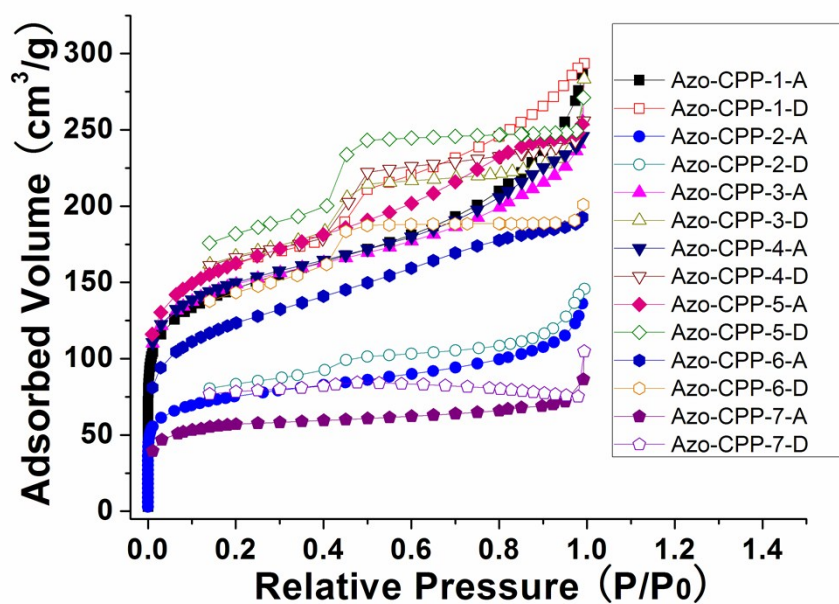

Fig. S10 Nitrogen adsorption and desorption isotherms at 77.3 K for all Azo-CPPs.

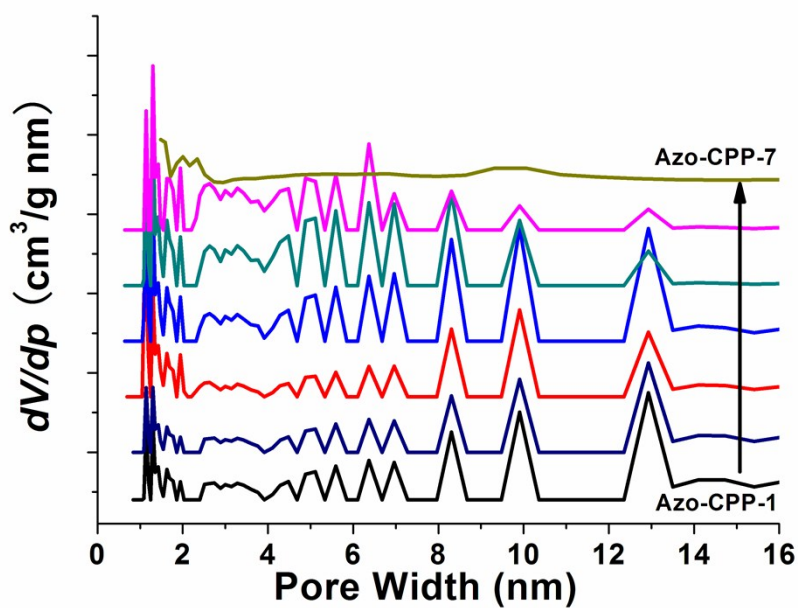

Fig. S11 Pore size distributions (PSD) calculated by the NLDFT method for all Azo-CPPs.

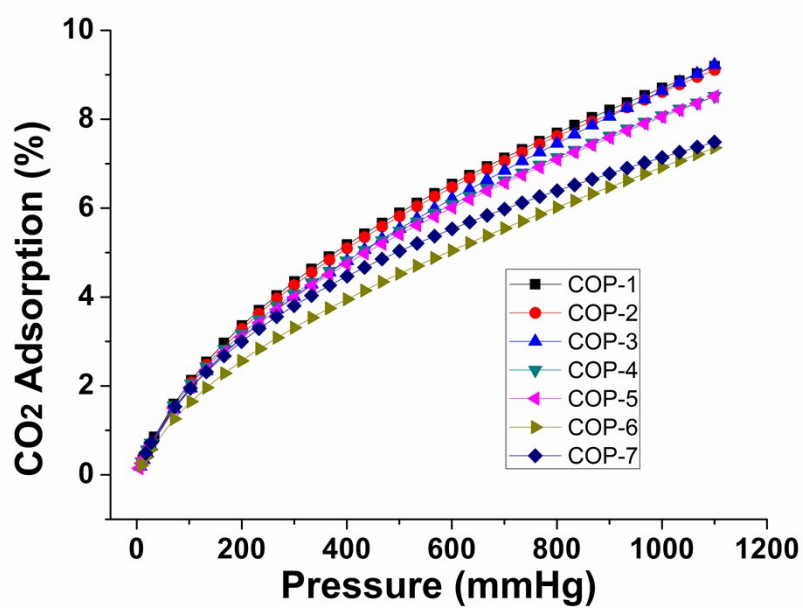

Fig. S12 CO<sub>2</sub> adsorption isotherms at 273 K for all Azo-CPPs.

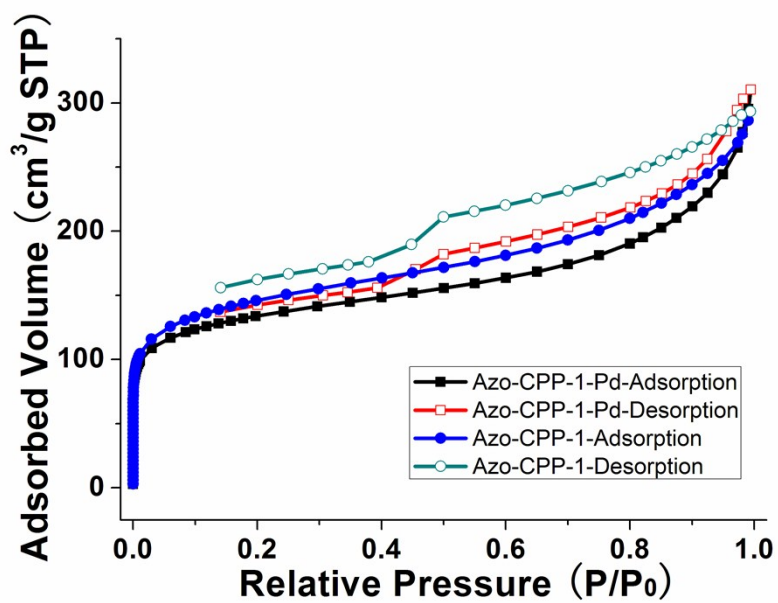

Fig. S13 Nitrogen adsorption and desorption isotherms at 77.3 K for Azo-CPP-1 and Azo-CPP-1-Pd.



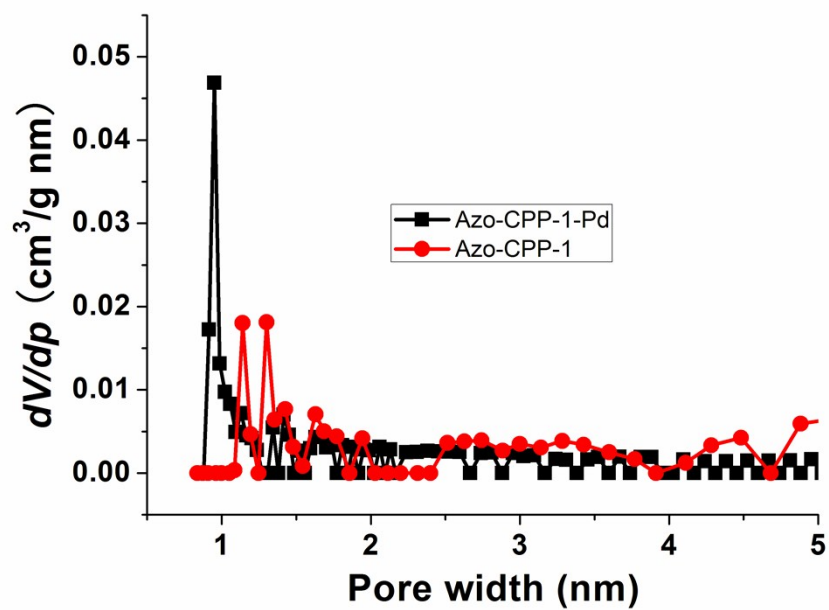

Fig. S14 Pore size distributions (PSD) calculated by the NLDFT method for Azo-CPP-1 and Azo-CPP-1-Pd.

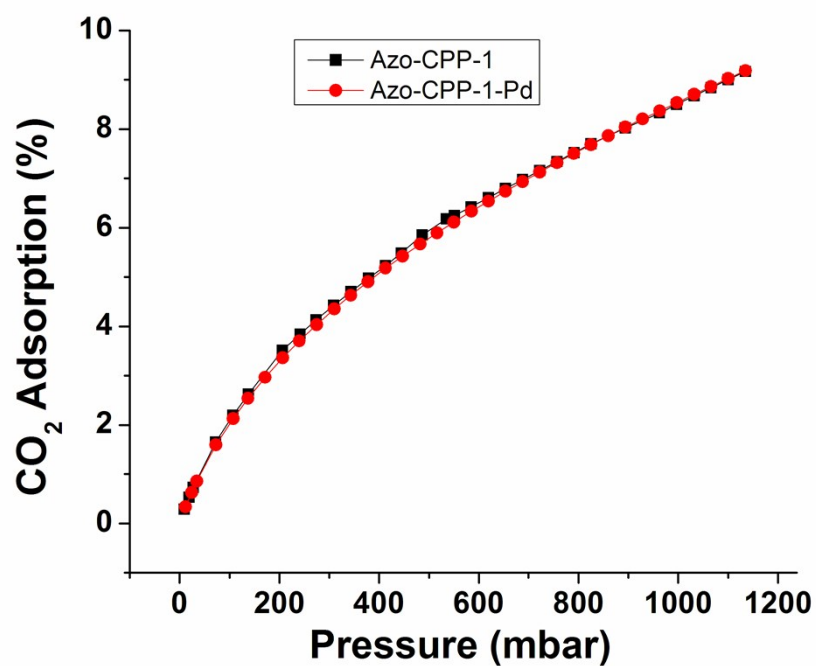

Fig. S 15 CO<sub>2</sub> adsorption isotherms at 273 K for Azo-CPP-1 and Azo-CPP-1-Pd

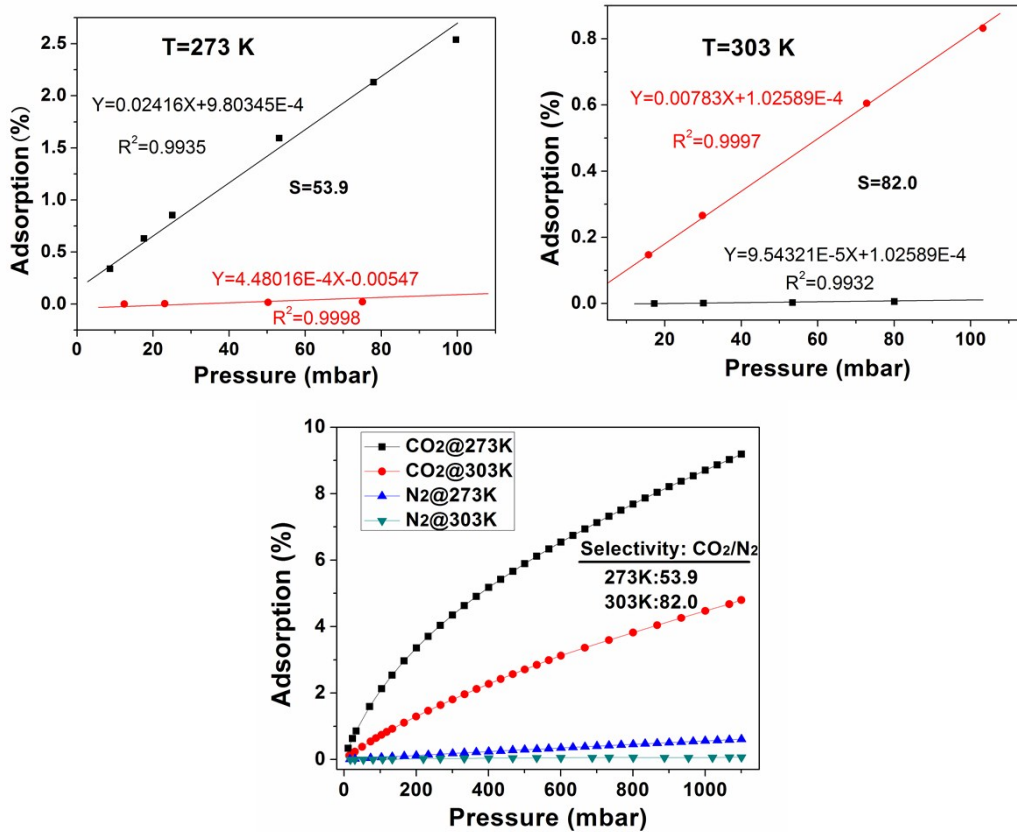

Fig. S16 CO<sub>2</sub>/N<sub>2</sub> selectivities for Azo-CPP-1 calculated using the Henry's Law constants in the linear low pressure range (0~100 mbar).

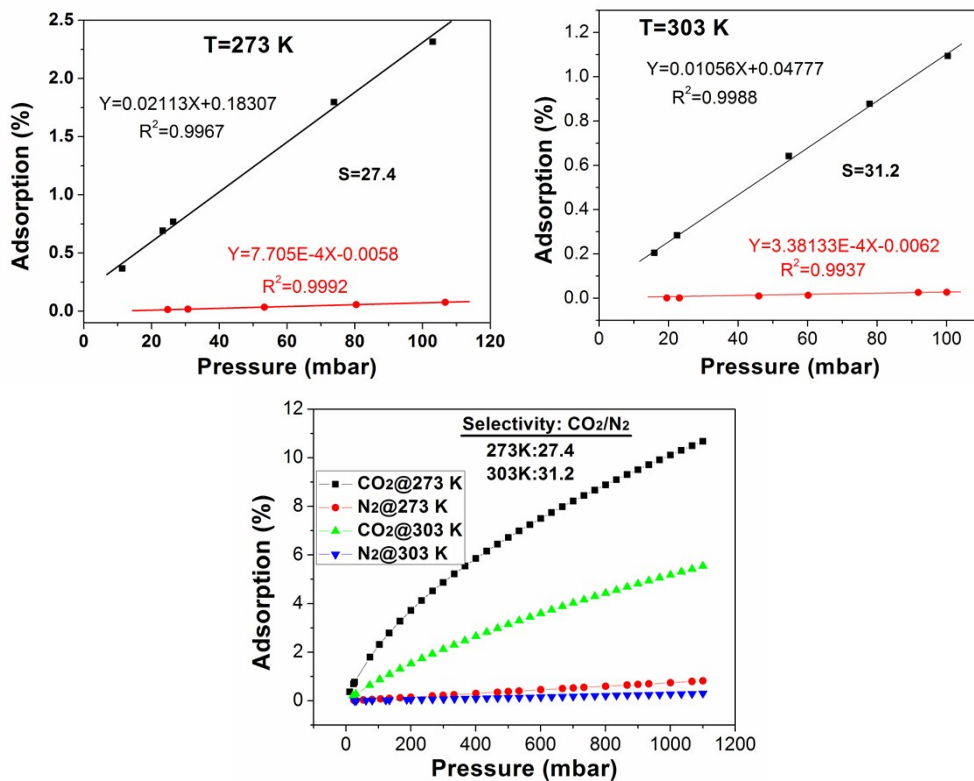

Fig. S17 CO<sub>2</sub>/N<sub>2</sub> selectivities for Azo-CPP-2 calculated using the Henry's Law constants in the linear low pressure range (0~100 mbar)

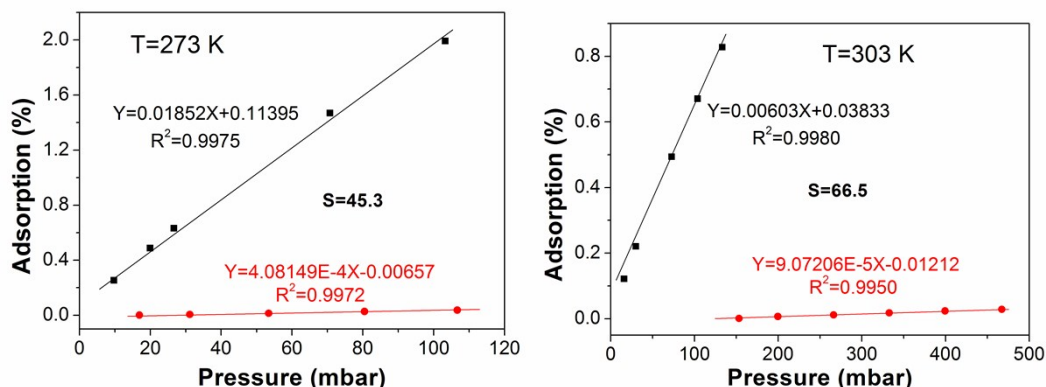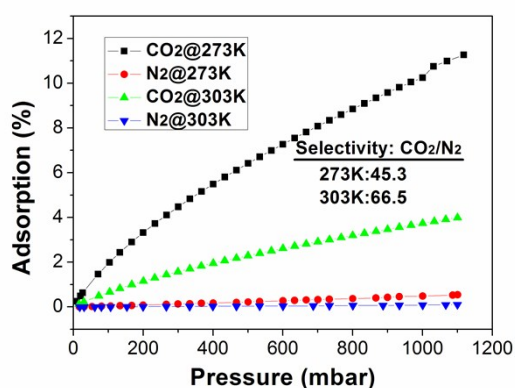

Fig. S18 CO<sub>2</sub>/N<sub>2</sub> selectivities for Azo-CPP-3 calculated using the Henry's Law constants in the linear low pressure range (0~100 mbar). Due to the very low adsorption of N<sub>2</sub> at 303 K in the range of 0~100 mbar, the data from 150 to 500 mbar were used instead.

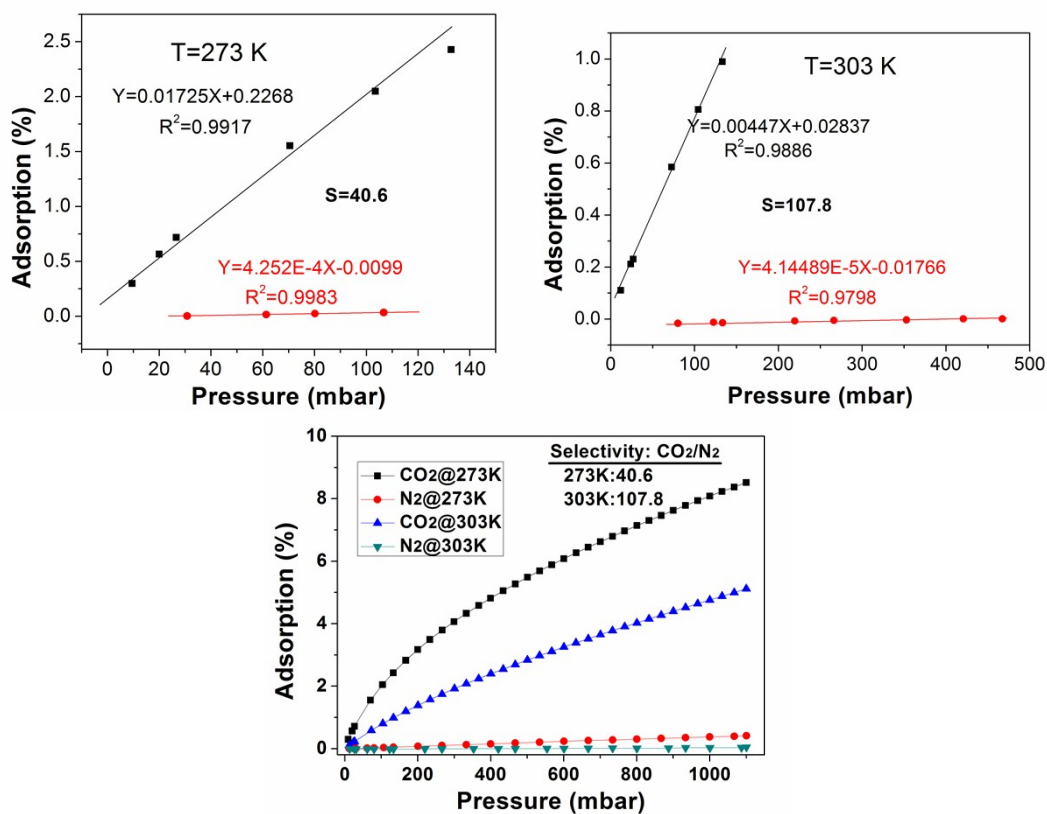

Fig. S19 CO<sub>2</sub>/N<sub>2</sub> selectivities for Azo-CPP-4 calculated using the Henry's Law constants in the linear low pressure range (0~100 mbar). Due to the very low adsorption of N<sub>2</sub> at 303 K in the range of 0~100 mbar, the data from 90 to 500 mbar were used instead.

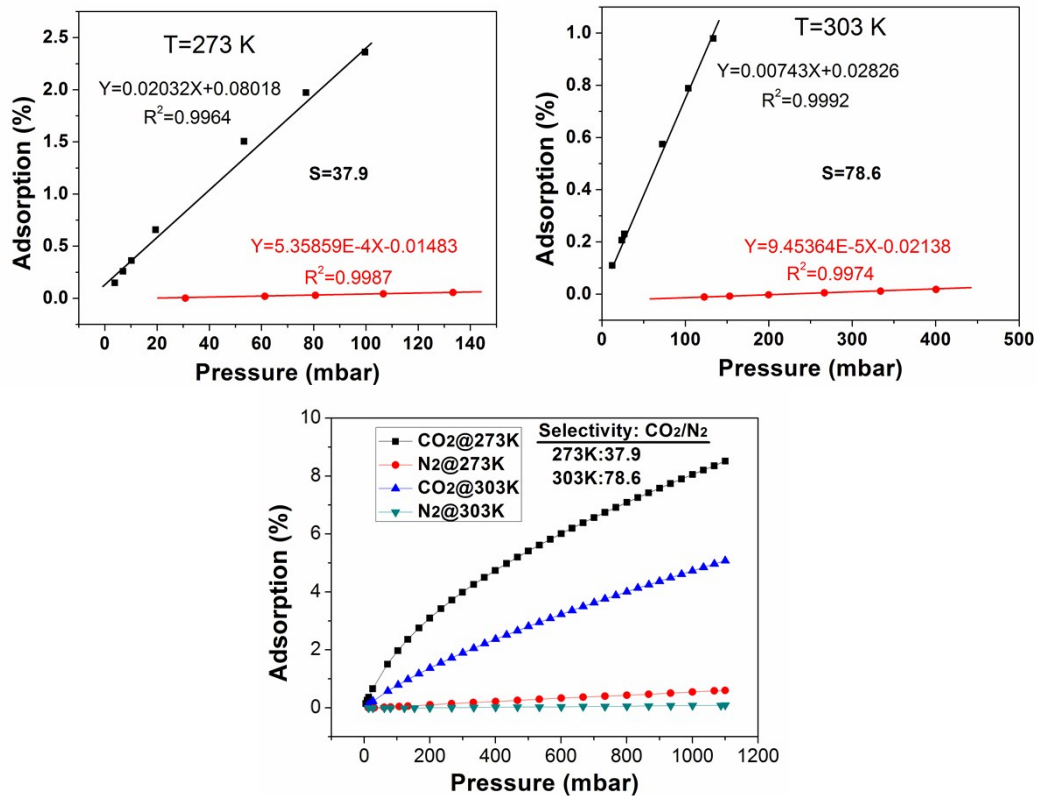

Fig. S20 CO<sub>2</sub>/N<sub>2</sub> selectivities for Azo-CPP-5 calculated using the Henry's Law constants in the linear low pressure range (0~100 mbar). Due to the very low adsorption of N<sub>2</sub> at 303 K in the range of 0~100 mbar, the data from 100 to 500 mbar were used instead.

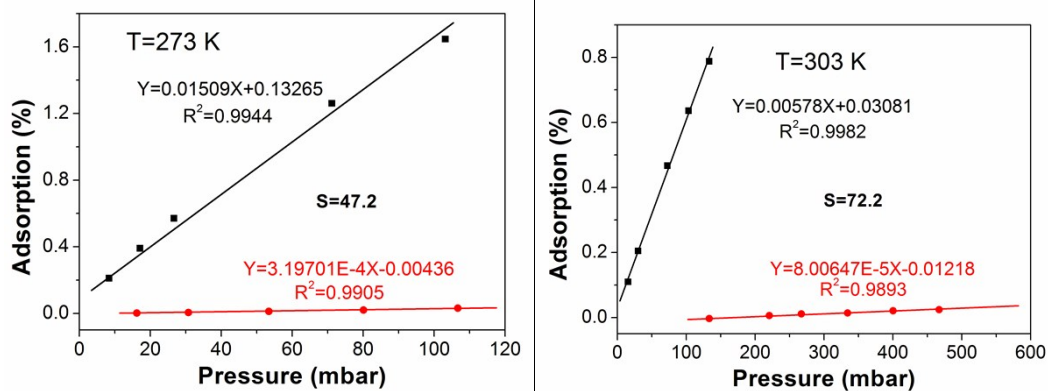

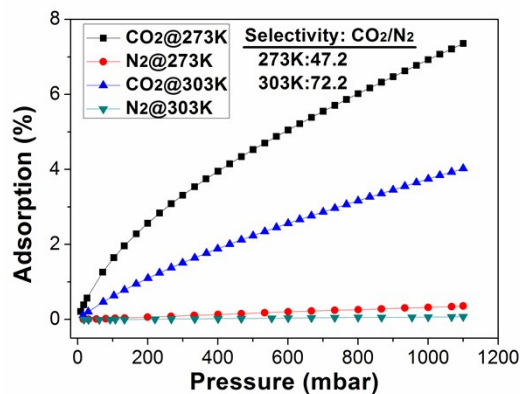

Fig. S21 CO<sub>2</sub>/N<sub>2</sub> selectivities for Azo-CPP-6 calculated using the Henry's Law constants in the linear low pressure range (0~100 mbar). Due to the very low adsorption of N<sub>2</sub> at 303 K in the range of 0~100 mbar, the data from 100 to 500 mbar were used instead.

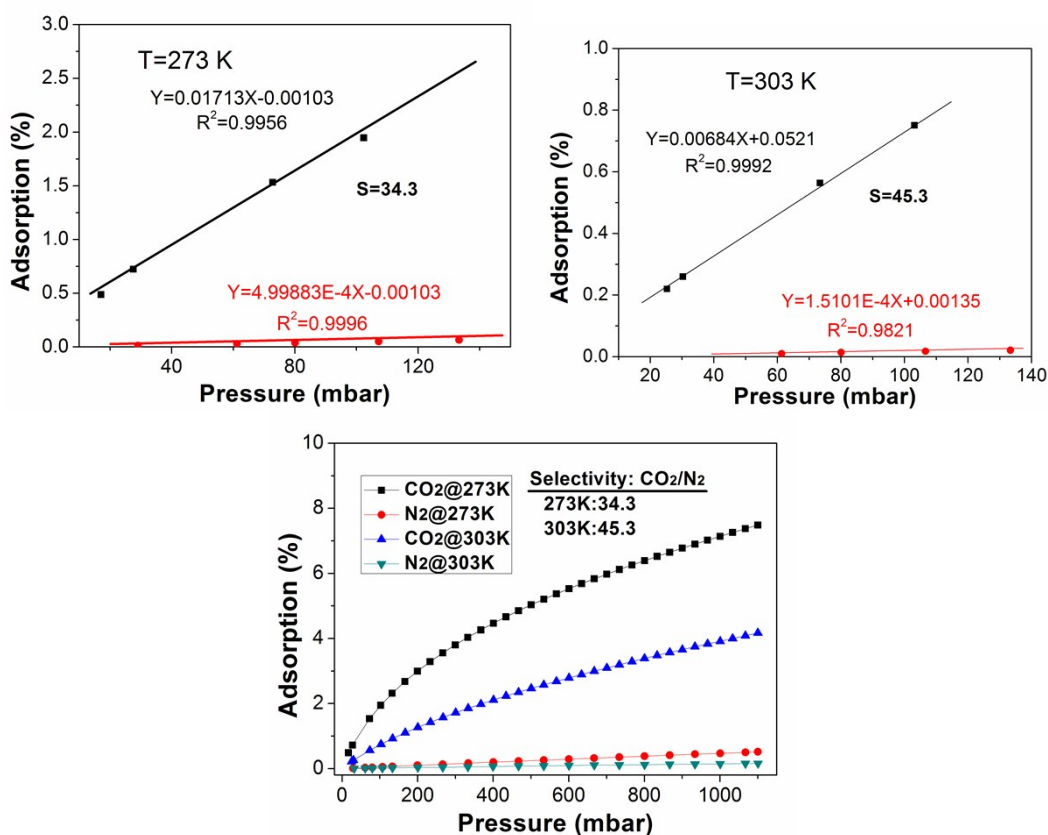

Fig. S22 CO<sub>2</sub>/N<sub>2</sub> selectivities for Azo-CPP-7 calculated using the Henry's Law constants in the linear low pressure range (0~150 mbar).
